# Supplementary material for: Prognostic Impact of In‐Hospital and Postdischarge Heart Failure in Patients With Acute Myocardial Infarction: A Nationwide Analysis Using Data From the Cardiovascular Disease in Norway (CVDNOR) Project
Source: PubMed Central journal article supplement — J Am Heart Assoc. 2017 Mar 15;6(3):e005277. doi: 10.1161/JAHA.116.005277 (PMC5524033; doi:10.1161/jaha.116.005277), 2017-03-15
Supplement: JAH3-6-e005277-s001.pdf [file JAH3-6-e005277-s001.pdf]

## **SUPPLEMENTAL MATERIAL**

**Table S1.** Changes over time in the excess mortality associated with in-hospital HF (Heart Failure)

| Study year            | Odds ratio (95% CI) | P for interaction* |
|-----------------------|---------------------|--------------------|
| In-hospital mortality |                     |                    |
| 2001                  | 1.25 (1.04–1.50)    |                    |
| 2002                  | 1.41 (1.17–1.69)    |                    |
| 2003                  | 1.80 (1.58–2.25)    |                    |
| 2004                  | 1.77 (1.46–2.15)    |                    |
| 2005                  | 1.79 (1.47–2.17)    |                    |
| 2006                  | 2.17 (1.77–2.67)    |                    |
| 2007                  | 2.04 (1.65–2.53)    |                    |
| 2008                  | 2.32 (1.87–2.88)    |                    |
| 2009                  | 2.33 (1.85–2.89)    |                    |
| Overall (2001–2009)   | 1.79 (1.68–1.91)    | <0.001             |
| 30-day mortality      |                     |                    |
| 2001                  | 1.30 (1.09–1.55)    |                    |
| 2002                  | 1.40 (1.17–1.67)    |                    |
| 2003                  | 1.89 (1.59–2.25)    |                    |
| 2004                  | 1.95 (1.62–2.34)    |                    |
| 2005                  | 1.70 (1.41–2.05)    |                    |
| 2006                  | 2.02 (1.66–2.47)    |                    |
| 2007                  | 1.95 (1.58–2.40)    |                    |
| 2008                  | 2.17 (1.75–2.68)    |                    |
| 2009                  | 2.20 (1.78–2.73)    |                    |
| Overall (2001–2009)   | 1.77 (1.66–1.88)    | <0.001             |

Analyses adjusted for sex, age, previous coronary heart disease, hypertension, diabetes mellitus, chronic obstructive pulmonary disease, valvular heart disease, renal failure and atrial fibrillation.

**Table S2.** Length of hospitalization for the incident acute myocardial infarction

| Study year          | Length of hospitalization (days), median (IQR) |                                |                            |                                |
|---------------------|------------------------------------------------|--------------------------------|----------------------------|--------------------------------|
|                     | No in-hospital heart failure                   |                                | In-hospital heart failure  |                                |
|                     | All patients<br>(n=57 541)                     | Discharged alive<br>(n=53 800) | All patients<br>(n=11 831) | Discharged alive<br>(n=10 178) |
| Overall (2001-2009) | 5 (4–8)                                        | 6 (4–8)                        | 8 (5–15)                   | 9 (6–15)                       |
| 2001                | 6 (5–9)                                        | 6 (5–9)                        | 9 (6–14)                   | 9 (7–15)                       |
| 2002                | 6 (5–9)                                        | 6 (5–9)                        | 9 (6–15)                   | 9 (6–15)                       |
| 2003                | 6 (4–9)                                        | 6 (5–9)                        | 9 (6–15)                   | 9 (6–15)                       |
| 2004                | 6 (4–8)                                        | 6 (4–8)                        | 9 (6–15)                   | 9 (6–16)                       |
| 2005                | 5 (4–8)                                        | 5 (4–8)                        | 9 (5–16)                   | 9 (6–17)                       |
| 2006                | 5 (4–8)                                        | 5 (4–8)                        | 9 (5–16)                   | 9 (6–16)                       |
| 2007                | 5 (4–7)                                        | 5 (4–7)                        | 8 (5–15)                   | 9 (6–15)                       |
| 2008                | 5 (4–7)                                        | 5 (5–7)                        | 8 (5–15)                   | 8 (5–15)                       |
| 2009                | 5 (3–7)                                        | 5 (4–7)                        | 7 (5–13)                   | 8 (5–14)                       |
| P for trend         | <0.001                                         | <0.001                         | 0.001                      | 0.002                          |

IQR indicates interquartile range.

**Table S3.** Changes over time in the excess one-year mortality associated with post-discharge heart failure

| Study year          | All-cause mortality      |                      | Cardiovascular mortality    |                      |
|---------------------|--------------------------|----------------------|-----------------------------|----------------------|
|                     | Hazard ratio<br>(95% CI) | P<br>for interaction | Subhazard ratio<br>(95% CI) | P<br>for interaction |
| 2001                | 6.58 (5.13–8.45)         |                      | 8.15 (5.36–11.34)           |                      |
| 2002                | 5.73 (4.35–7.54)         |                      | 7.15 (4.95–10.33)           |                      |
| 2003                | 4.39 (3.29–5.87)         |                      | 5.77 (3.91–8.53)            |                      |
| 2004                | 7.22 (5.34–9.77)         |                      | 11.22 (7.32–17.20)          |                      |
| 2005                | 6.87 (5.00–9.43)         |                      | 14.50 (9.20–22.85)          |                      |
| 2006                | 5.35 (3.90–7.33)         |                      | 5.90 (3.64–9.57)            |                      |
| 2007                | 6.67 (4.79–9.30)         |                      | 9.60 (5.85–15.73)           |                      |
| 2008                | 6.44 (4.70–8.82)         |                      | 6.99 (4.04–12.06)           |                      |
| Overall (2001–2008) | 5.98 (5.39–6.64)         | 0.67                 | 7.93 (6.84–9.19)            | 0.85                 |

Analyses adjusted for sex, age, previous coronary heart disease, hypertension, diabetes mellitus, chronic obstructive pulmonary disease, valvular heart disease, renal failure and atrial fibrillation.

**Table S4.** Changes over time in the odds of receiving myocardial revascularization between patients with and without early-onset heart failure: a CVDNOR project

| Study year          | Odds ratio (95% CI) | P for interaction |
|---------------------|---------------------|-------------------|
| 2001                | 0.74 (0.61–0.90)    |                   |
| 2002                | 0.72 (0.60–0.85)    |                   |
| 2003                | 0.69 (0.59–0.80)    |                   |
| 2004                | 0.75 (0.65–0.87)    |                   |
| 2005                | 0.77 (0.68–0.88)    |                   |
| 2006                | 0.87 (0.76–0.98)    |                   |
| 2007                | 0.99 (0.88–1.13)    |                   |
| 2008                | 1.09 (0.96–1.23)    |                   |
| 2009                | 1.14 (1.01–1.29)    |                   |
| Overall (2001–2009) | 0.90 (0.86–0.94)    | <0.001            |

Analyses adjusted for sex, age, previous coronary heart disease, hypertension, diabetes, renal failure, chronic obstructive pulmonary disease, valvular heart disease and atrial fibrillation.
